# Supplementary material for: Caring for Adolescents and Young Adults (AYA) with Cancer: A Scoping Review into Caregiver Burdens and Needs
Source: MDPI journal article supplement (doi:10.3390/cancers15123263), 2023-06-20
Supplement: s1 [file s1]

**Data S1. PRISMA-checklist for scoping reviews**

| Section and Topic             | Item # | Checklist item                                                                                                                                                                                                                                                                                       | Location where item is reported |
|-------------------------------|--------|------------------------------------------------------------------------------------------------------------------------------------------------------------------------------------------------------------------------------------------------------------------------------------------------------|---------------------------------|
| <b>TITLE</b>                  |        |                                                                                                                                                                                                                                                                                                      |                                 |
| Title                         | 1      | Identify the report as a scoping review.                                                                                                                                                                                                                                                             | Page 1                          |
| <b>ABSTRACT</b>               |        |                                                                                                                                                                                                                                                                                                      |                                 |
| Abstract                      | 2      | See the PRISMA 2020 for Abstracts checklist.                                                                                                                                                                                                                                                         | Checked                         |
| <b>INTRODUCTION</b>           |        |                                                                                                                                                                                                                                                                                                      |                                 |
| Rationale                     | 3      | Describe the rationale for the review in the context of existing knowledge.                                                                                                                                                                                                                          | Page 1-3                        |
| Objectives                    | 4      | Provide an explicit statement of the objective(s) or question(s) the review addresses.                                                                                                                                                                                                               | Page 3                          |
| <b>METHODS</b>                |        |                                                                                                                                                                                                                                                                                                      |                                 |
| Eligibility criteria          | 5      | Specify the inclusion and exclusion criteria for the review and how studies were grouped for the syntheses.                                                                                                                                                                                          | Page 3                          |
| Information sources           | 6      | Specify all databases, registers, websites, organisations, reference lists and other sources searched or consulted to identify studies. Specify the date when each source was last searched or consulted.                                                                                            | Page 3                          |
| Search strategy               | 7      | Present the full search strategies for all databases, registers and websites, including any filters and limits used.                                                                                                                                                                                 | Appendix                        |
| Selection process             | 8      | Specify the methods used to decide whether a study met the inclusion criteria of the review, including how many reviewers screened each record and each report retrieved, whether they worked independently, and if applicable, details of automation tools used in the process.                     | Page 4                          |
| Data collection process       | 9      | Specify the methods used to collect data from reports, including how many reviewers collected data from each report, whether they worked independently, any processes for obtaining or confirming data from study investigators, and if applicable, details of automation tools used in the process. | Page 3-4                        |
| Data items                    | 10a    | List and define all outcomes for which data were sought. Specify whether all results that were compatible with each outcome domain in each study were sought (e.g. for all measures, time points, analyses), and if not, the methods used to decide which results to collect.                        | Page 3-4                        |
|                               | 10b    | List and define all other variables for which data were sought (e.g. participant and intervention characteristics, funding sources). Describe any assumptions made about any missing or unclear information.                                                                                         | Page 3-4                        |
| Study risk of bias assessment | 11     | Specify the methods used to assess risk of bias in the included studies, including details of the tool(s) used, how many reviewers assessed each study and whether they worked independently, and if applicable, details of automation tools used in the process.                                    | Page 4                          |
| Effect measures               | 12     | Specify for each outcome the effect measure(s) (e.g. risk ratio, mean difference) used in the synthesis or presentation of results.                                                                                                                                                                  | N/A                             |
| Synthesis methods             | 13a    | Describe the processes used to decide which studies were eligible for each synthesis (e.g. tabulating the study intervention characteristics and comparing against the planned groups for each synthesis (item #5)).                                                                                 | Page 3-4                        |

| Section and Topic             | Item # | Checklist item                                                                                                                                                                                                                                                                       | Location where item is reported |
|-------------------------------|--------|--------------------------------------------------------------------------------------------------------------------------------------------------------------------------------------------------------------------------------------------------------------------------------------|---------------------------------|
|                               | 13b    | Describe any methods required to prepare the data for presentation or synthesis, such as handling of missing summary statistics, or data conversions.                                                                                                                                | N/A                             |
|                               | 13c    | Describe any methods used to tabulate or visually display results of individual studies and syntheses.                                                                                                                                                                               | N/A                             |
|                               | 13d    | Describe any methods used to synthesize results and provide a rationale for the choice(s). If meta-analysis was performed, describe the model(s), method(s) to identify the presence and extent of statistical heterogeneity, and software package(s) used.                          | N/A                             |
|                               | 13e    | Describe any methods used to explore possible causes of heterogeneity among study results (e.g. subgroup analysis, meta-regression).                                                                                                                                                 | N/A                             |
|                               | 13f    | Describe any sensitivity analyses conducted to assess robustness of the synthesized results.                                                                                                                                                                                         | N/A                             |
| Reporting bias assessment     | 14     | Describe any methods used to assess risk of bias due to missing results in a synthesis (arising from reporting biases).                                                                                                                                                              | N/A                             |
| Certainty assessment          | 15     | Describe any methods used to assess certainty (or confidence) in the body of evidence for an outcome.                                                                                                                                                                                | N/A                             |
| <b>RESULTS</b>                |        |                                                                                                                                                                                                                                                                                      |                                 |
| Study selection               | 16a    | Describe the results of the search and selection process, from the number of records identified in the search to the number of studies included in the review, ideally using a flow diagram.                                                                                         | Page 4                          |
|                               | 16b    | Cite studies that might appear to meet the inclusion criteria, but which were excluded, and explain why they were excluded.                                                                                                                                                          | Page 4                          |
| Study characteristics         | 17     | Cite each included study and present its characteristics.                                                                                                                                                                                                                            | Page 5-19                       |
| Risk of bias in studies       | 18     | Present assessments of risk of bias for each included study.                                                                                                                                                                                                                         | N/A                             |
| Results of individual studies | 19     | For all outcomes, present, for each study: (a) summary statistics for each group (where appropriate) and (b) an effect estimate and its precision (e.g. confidence/credible interval), ideally using structured tables or plots.                                                     | N/A                             |
| Results of syntheses          | 20a    | For each synthesis, briefly summarise the characteristics and risk of bias among contributing studies.                                                                                                                                                                               | Page 5-19                       |
|                               | 20b    | Present results of all statistical syntheses conducted. If meta-analysis was done, present for each the summary estimate and its precision (e.g. confidence/credible interval) and measures of statistical heterogeneity. If comparing groups, describe the direction of the effect. | N/A                             |
|                               | 20c    | Present results of all investigations of possible causes of heterogeneity among study results.                                                                                                                                                                                       | N/A                             |
|                               | 20d    | Present results of all sensitivity analyses conducted to assess the robustness of the synthesized results.                                                                                                                                                                           | N/A                             |
| Reporting biases              | 21     | Present assessments of risk of bias due to missing results (arising from reporting biases) for each synthesis assessed.                                                                                                                                                              | N/A                             |

| Section and Topic                              | Item # | Checklist item                                                                                                                                                                                                                             | Location where item is reported |
|------------------------------------------------|--------|--------------------------------------------------------------------------------------------------------------------------------------------------------------------------------------------------------------------------------------------|---------------------------------|
| Certainty of evidence                          | 22     | Present assessments of certainty (or confidence) in the body of evidence for each outcome assessed.                                                                                                                                        | N/A                             |
| <b>DISCUSSION</b>                              |        |                                                                                                                                                                                                                                            |                                 |
| Discussion                                     | 23a    | Provide a general interpretation of the results in the context of other evidence.                                                                                                                                                          | Page 20-22                      |
|                                                | 23b    | Discuss any limitations of the evidence included in the review.                                                                                                                                                                            | Page 22                         |
|                                                | 23c    | Discuss any limitations of the review processes used.                                                                                                                                                                                      | Page 22                         |
|                                                | 23d    | Discuss implications of the results for practice, policy, and future research.                                                                                                                                                             | Page 22                         |
| <b>OTHER INFORMATION</b>                       |        |                                                                                                                                                                                                                                            |                                 |
| Registration and protocol                      | 24a    | Provide registration information for the review, including register name and registration number, or state that the review was not registered.                                                                                             | Page 22                         |
|                                                | 24b    | Indicate where the review protocol can be accessed, or state that a protocol was not prepared.                                                                                                                                             | Page 22                         |
|                                                | 24c    | Describe and explain any amendments to information provided at registration or in the protocol.                                                                                                                                            | N/A                             |
| Support                                        | 25     | Describe sources of financial or non-financial support for the review, and the role of the funders or sponsors in the review.                                                                                                              | Page 22                         |
| Competing interests                            | 26     | Declare any competing interests of review authors.                                                                                                                                                                                         | Page 22                         |
| Availability of data, code and other materials | 27     | Report which of the following are publicly available and where they can be found: template data collection forms; data extracted from included studies; data used for all analyses; analytic code; any other materials used in the review. | N/A                             |

## Data S2. Search strategy for the scoping review

Search History:

2022-10-28

Ovid MEDLINE(R) ALL <1946 to October 27, 2022>

| #  | Query                                                                                                                                          | Hits    |
|----|------------------------------------------------------------------------------------------------------------------------------------------------|---------|
| 1  | adolescent/                                                                                                                                    | 2191794 |
| 2  | "young adult"/                                                                                                                                 | 999023  |
| 3  | adolescent*.ti,ab,kf.                                                                                                                          | 310178  |
| 4  | "young adult*".ti,ab,kf.                                                                                                                       | 115611  |
| 5  | teen.ti,ab,kf.                                                                                                                                 | 6308    |
| 6  | teenage*.ti,ab,kf.                                                                                                                             | 24048   |
| 7  | AYA.ti,ab,kf.                                                                                                                                  | 2117    |
| 8  | AYAs.ti,ab,kf.                                                                                                                                 | 1241    |
| 9  | TYA?.ti,ab,kf.                                                                                                                                 | 617     |
| 10 | "emerging adult*".ti,ab,kf.                                                                                                                    | 3819    |
| 11 | or/1-10 [AYAs]                                                                                                                                 | 2775425 |
| 12 | exp neoplasms/                                                                                                                                 | 3750717 |
| 13 | neoplas*.ti,ab,kf.                                                                                                                             | 439092  |
| 14 | tumo?r?.ti,ab,kf.                                                                                                                              | 1914552 |
| 15 | cancer?.ti,ab,kf.                                                                                                                              | 2139381 |
| 16 | malignan*.ti,ab,kf.                                                                                                                            | 660980  |
| 17 | metasta*.ti,ab,kf.                                                                                                                             | 599011  |
| 18 | carcinoma?.ti,ab,kf.                                                                                                                           | 743589  |
| 19 | melanoma?.ti,ab,kf.                                                                                                                            | 133943  |
| 20 | sarcoma?.ti,ab,kf.                                                                                                                             | 104479  |
| 21 | leuk?emia?.ti,ab,kf.                                                                                                                           | 281750  |
| 22 | lymphoma?.ti,ab,kf.                                                                                                                            | 198622  |
| 23 | or/12-22 [cancer]                                                                                                                              | 4986597 |
| 24 | caregiver?.ti,ab,kf.                                                                                                                           | 84440   |
| 25 | "care giver?".ti,ab,kf.                                                                                                                        | 2941    |
| 26 | (informal adj3 (care* or support*).ti,ab,kf.                                                                                                   | 9664    |
| 27 | ((family or families or spous* or partner? or parent* or sibling? or friend? or relative? or "loved one?") adj3 (carer* or support*).ti,ab,kf. | 45859   |
| 28 | (informal or family or families or spous* or partner? or parent* or sibling? or friend? or relative? or "loved one?").ti,ab,kf. and caregiver/ | 29393   |
| 29 | "caregiver burden"/                                                                                                                            | 487     |
| 30 | (care* adj3 (burden or needs)).ti,ab,kf.                                                                                                       | 40236   |
| 31 | or/24-30 [informal caregivers]                                                                                                                 | 163399  |
| 32 | "caregiver burden"/                                                                                                                            | 487     |
| 33 | "needs assessment"/                                                                                                                            | 32260   |
| 34 | burden*.ti,ab,kf.                                                                                                                              | 295410  |
| 35 | impact*.ti,ab,kf.                                                                                                                              | 1451556 |
| 36 | needs.ti,ab,kf.                                                                                                                                | 406577  |
| 37 | experience*.ti,ab,kf.                                                                                                                          | 1285780 |
| 38 | support.ti,ab,kf.                                                                                                                              | 1197195 |
| 39 | or/32-38 [burden]                                                                                                                              | 4055126 |
| 40 | 11 and 23 and 31 and 39 [AYAs AND cancer AND informal caregivers AND burden]                                                                   | 2190    |

Single line search:

((adolescent/ OR "young adult"/) OR (adolescent\* OR "young adult\*" OR teen OR teenage\* OR AYA OR AYAs OR TYA? OR "emerging adult\*").ti,ab,kf.) AND (exp neoplasms/ OR (neoplas\* OR tumor? OR cancer? OR malignan\* OR metasta\* OR carcinoma? OR melanoma? OR sarcoma? OR leuk?emia? OR lymphoma?).ti,ab,kf.) AND ((caregiver? OR "care giver?").ti,ab,kf. OR (informal ADJ3 (care\* OR support\*).ti,ab,kf. OR ((family OR families OR spous\* OR partner? OR parent\* OR sibling? OR friend? OR relative? OR "loved one?") ADJ3 (carer\* OR support\*).ti,ab,kf. OR ((informal OR family OR families OR spous\* OR partner? OR parent\* OR sibling? OR friend? OR relative? OR "loved one?").ti,ab,kf. AND caregiver/) OR "caregiver burden"/ OR (care\* ADJ3 (burden OR needs)).ti,ab,kf.) AND (("caregiver burden"/ OR "needs assessment"/) OR (burden\* OR impact\* OR needs OR experience\* OR support).ti,ab,kf.)

**Embase.com:**

| #  | Query                                                                                                                                                                                                                                 | Hits    |
|----|---------------------------------------------------------------------------------------------------------------------------------------------------------------------------------------------------------------------------------------|---------|
| 1  | 'adolescent'/exp                                                                                                                                                                                                                      | 1857682 |
| 2  | 'young adult'/exp                                                                                                                                                                                                                     | 478293  |
| 3  | adolescent*.ti,ab,kw                                                                                                                                                                                                                  | 409701  |
| 4  | 'young adult*':ti,ab,kw                                                                                                                                                                                                               | 153692  |
| 5  | teen:ti,ab,kw                                                                                                                                                                                                                         | 8394    |
| 6  | teenage*.ti,ab,kw                                                                                                                                                                                                                     | 34172   |
| 7  | aya\$:ti,ab,kw                                                                                                                                                                                                                        | 4821    |
| 8  | tya\$:ti,ab,kw                                                                                                                                                                                                                        | 369     |
| 9  | 'emerging adult*':ti,ab,kw                                                                                                                                                                                                            | 4305    |
| 10 | #1 OR #2 OR #3 OR #4 OR #5 OR #6 OR #7 OR #8 OR #9                                                                                                                                                                                    | 2328942 |
| 11 | 'neoplasm'/exp                                                                                                                                                                                                                        | 5789748 |
| 12 | neoplas*.ti,ab,kw                                                                                                                                                                                                                     | 530858  |
| 13 | tumor\$:ti,ab,kw                                                                                                                                                                                                                      | 2635304 |
| 14 | cancer\$:ti,ab,kw                                                                                                                                                                                                                     | 3067846 |
| 15 | malignan*.ti,ab,kw                                                                                                                                                                                                                    | 955136  |
| 16 | metasta*.ti,ab,kw                                                                                                                                                                                                                     | 877937  |
| 17 | carcinoma\$:ti,ab,kw                                                                                                                                                                                                                  | 1015647 |
| 18 | melanoma\$:ti,ab,kw                                                                                                                                                                                                                   | 189928  |
| 19 | sarcoma\$:ti,ab,kw                                                                                                                                                                                                                    | 130960  |
| 20 | leuk\$emia\$:ti,ab,kw                                                                                                                                                                                                                 | 395899  |
| 21 | lymphoma\$:ti,ab,kw                                                                                                                                                                                                                   | 294715  |
| 22 | #11 OR #12 OR #13 OR #14 OR #15 OR #16 OR #17 OR #18 OR #19 OR #20 OR #21                                                                                                                                                             | 6894756 |
| 23 | 'informal care'/de                                                                                                                                                                                                                    | 59      |
| 24 | 'informal caregiver'/de                                                                                                                                                                                                               | 46      |
| 25 | caregiver\$:ti,ab,kw                                                                                                                                                                                                                  | 118371  |
| 26 | 'care giver\$':ti,ab,kw                                                                                                                                                                                                               | 5456    |
| 27 | (informal NEAR/3 (care* OR support*)):ti,ab,kw                                                                                                                                                                                        | 11943   |
| 28 | ((family OR families OR spous* OR partner\$ OR parent* OR sibling\$ OR friend\$ OR relative\$ OR 'loved one\$') NEAR/3 (carer* OR support*)):ti,ab,kw                                                                                 | 60301   |
| 29 | (informal:ti,ab,kw OR family:ti,ab,kw OR families:ti,ab,kw OR spous*:ti,ab,kw OR partner\$:ti,ab,kw OR parent*:ti,ab,kw OR sibling\$:ti,ab,kw OR friend\$:ti,ab,kw OR relative*:ti,ab,kw OR 'loved one\$:ti,ab,kw) AND 'caregiver'/de | 54850   |
| 30 | 'caregiver burden'/de                                                                                                                                                                                                                 | 9818    |
| 31 | (care* NEAR/3 (burden OR needs)):ti,ab,kw                                                                                                                                                                                             | 56285   |
| 32 | #23 OR #24 OR #25 OR #26 OR #27 OR #28 OR #29 OR #30 OR #31                                                                                                                                                                           | 223861  |

|    |                                                                                       |         |
|----|---------------------------------------------------------------------------------------|---------|
| 33 | 'caregiver burden'/de                                                                 | 9818    |
| 34 | burden*:ti,ab,kw                                                                      | 449855  |
| 35 | impact*:ti,ab,kw                                                                      | 2026017 |
| 36 | needs:ti,ab,kw                                                                        | 554317  |
| 37 | experience*:ti,ab,kw                                                                  | 1828517 |
| 38 | support:ti,ab,kw                                                                      | 1548000 |
| 39 | #33 OR #34 OR #35 OR #36 OR #37 OR #38                                                | 5523487 |
| 40 | #10 AND #22 AND #32 AND #39                                                           | 2541    |
| 41 | #40 NOT ('conference abstract'/it OR 'conference paper'/it OR 'conference review'/it) | 1787    |
| 42 | #40 AND ('conference abstract'/it OR 'conference paper'/it OR 'conference review'/it) | 754     |

#### Single line search:

((adolescent/exp OR 'young adult'/exp) OR (adolescent\* OR 'young adult\*' OR teen OR teenage\* OR AYA\$ OR TYA\$ OR 'emerging adult\*'):ti,ab,kw) AND (neoplasm/exp OR (neoplas\* OR tumor\$ OR cancer\$ OR malignan\* OR metasta\* OR carcinoma\$ OR melanoma\$ OR sarcoma\$ OR leuk\$emia\$ OR lymphoma\$):ti,ab,kw) AND (('informal care'/de OR 'informal caregiver'/de OR 'informal caregiving'/de) OR (caregiver\$ OR 'care giver\$'):ti,ab,kw OR (informal NEAR/3 (care\* OR support\*)):ti,ab,kw OR ((family OR families OR spous\* OR partner\$ OR parent\* OR sibling\$ OR friend\$ OR relative\$ OR 'loved one\$') NEAR/3 (carer\* OR support\*)):ti,ab,kw OR ((informal OR family OR families OR spous\* OR partner\$ OR parent\* OR sibling\$ OR friend\$ OR relative\* OR 'loved one\$'):ti,ab,kw AND caregiver/de) OR 'caregiver burden'/de OR (care\* NEAR/3 (burden OR needs)):ti,ab,kw) AND ('caregiver burden'/de OR (burden\* OR impact\* OR needs OR experience\* OR support):ti,ab,kw)

#### CINAHL via EbscoHost:

| #  | Query                                                                                                                                                                                                                                                                                                                                                                                                                                                                                                                                                         | Resultaten |
|----|---------------------------------------------------------------------------------------------------------------------------------------------------------------------------------------------------------------------------------------------------------------------------------------------------------------------------------------------------------------------------------------------------------------------------------------------------------------------------------------------------------------------------------------------------------------|------------|
| S1 | (MH ("Adolescence+" OR "young adult") OR TI (adolescent* OR "young adult*" OR teen OR teenage* OR AYA# OR TYA# OR "emerging adult*") OR AB (adolescent* OR "young adult*" OR teen OR teenage* OR AYA# OR TYA# OR "emerging adult*"))                                                                                                                                                                                                                                                                                                                          | 764,241    |
| S2 | (MH (neoplasms+) OR TI (neoplas* OR tumor# OR cancer# OR malignan* OR metasta* OR carcinoma# OR melanoma# OR sarcoma# OR leuk#emia# OR lymphoma#) OR AB (neoplas* OR tumor# OR cancer# OR malignan* OR metasta* OR carcinoma# OR melanoma# OR sarcoma# OR leuk#emia# OR lymphoma#))                                                                                                                                                                                                                                                                           | 872,310    |
| S3 | (MH ("caregivers+" OR "Caregiver Burden+") OR TI (caregiver# OR "care giver#") OR TI (informal N2 (care* OR support*)) OR TI ((family OR families OR spous* OR partner# OR parent* OR sibling# OR friend# OR relative# OR "loved one#") N2 (carer* OR support*)) OR TI (care* N2 (burden OR needs)) OR AB (caregiver# OR "care giver#") OR AB (informal N2 (care* OR support*)) OR AB ((family OR families OR spous* OR partner# OR parent* OR sibling# OR friend# OR relative# OR "loved one#") N2 (carer* OR support*)) OR AB (care* N2 (burden OR needs))) | 141,122    |
| S4 | (MH ("Caregiver Burden+") OR TI (burden* OR impact* OR needs OR experience* OR support) OR AB (burden* OR impact* OR needs OR experience* OR support))                                                                                                                                                                                                                                                                                                                                                                                                        | 1,579,537  |
| S5 | S1 AND S2 AND S3 AND S4                                                                                                                                                                                                                                                                                                                                                                                                                                                                                                                                       | 1,492      |

#### Single line search:

(MH ("Adolescence+" OR "young adult") OR TI (adolescent\* OR "young adult\*" OR teen OR teenage\* OR AYA# OR TYA# OR "emerging adult\*")) OR AB (adolescent\* OR "young adult\*" OR teen OR teenage\* OR AYA# OR TYA# OR "emerging adult\*")) AND (MH (neoplasms+) OR TI (neoplas\* OR tumor# OR cancer# OR malignan\* OR metasta\* OR carcinoma# OR melanoma# OR sarcoma# OR leuk#emia# OR lymphoma#) OR AB (neoplas\* OR tumor# OR cancer# OR malignan\* OR metasta\* OR carcinoma# OR melanoma# OR sarcoma# OR leuk#emia# OR lymphoma#)) AND (MH ("caregivers+" OR "Caregiver Burden+") OR TI (caregiver# OR "care giver#") OR TI (informal N2 (care\* OR support\*)) OR TI ((family OR families OR spous\* OR partner# OR parent\* OR sibling# OR friend# OR relative# OR "loved one#") N2 (carer\* OR support\*)) OR TI (care\* N2 (burden OR needs)) OR AB (caregiver# OR "care giver#") OR AB (informal N2 (care\* OR support\*)) OR AB ((family OR families OR spous\* OR partner# OR parent\* OR sibling# OR friend# OR relative# OR "loved one#") N2 (carer\* OR support\*)) OR AB (care\* N2 (burden OR needs))) AND (MH ("Caregiver Burden+") OR TI (burden\* OR impact\* OR needs OR experience\* OR support) OR AB (burden\* OR impact\* OR needs OR experience\* OR support))

# Ovid PsycInfo

| #  | Query                                                                                                                                           | Hits |
|----|-------------------------------------------------------------------------------------------------------------------------------------------------|------|
| 1  | early adolescence/                                                                                                                              |      |
| 2  | emerging adulthood/                                                                                                                             |      |
| 3  | adolescent*.ti,ab,id.                                                                                                                           |      |
| 4  | "young adult*".ti,ab,id.                                                                                                                        |      |
| 5  | teen.ti,ab,id.                                                                                                                                  |      |
| 6  | teenage*.ti,ab,id.                                                                                                                              |      |
| 7  | AYA.ti,ab,id.                                                                                                                                   |      |
| 8  | AYAs.ti,ab,id.                                                                                                                                  |      |
| 9  | TYA?.ti,ab,id.                                                                                                                                  |      |
| 10 | "emerging adult*".ti,ab,id.                                                                                                                     |      |
| 11 | OR/1-10 [AYAs]                                                                                                                                  |      |
| 12 | exp neoplasms/                                                                                                                                  |      |
| 13 | neoplas*.ti,ab,id.                                                                                                                              |      |
| 14 | tumor?.ti,ab,id.                                                                                                                                |      |
| 15 | cancer?.ti,ab,id.                                                                                                                               |      |
| 16 | malignan*.ti,ab,id.                                                                                                                             |      |
| 17 | metasta*.ti,ab,id.                                                                                                                              |      |
| 18 | carcinoma?.ti,ab,id.                                                                                                                            |      |
| 19 | melanoma?.ti,ab,id.                                                                                                                             |      |
| 20 | sarcoma?.ti,ab,id.                                                                                                                              |      |
| 21 | leuk?emia?.ti,ab,id.                                                                                                                            |      |
| 22 | lymphoma?.ti,ab,id.                                                                                                                             |      |
| 23 | OR/12-22 [cancer]                                                                                                                               |      |
| 24 | caregivers/                                                                                                                                     |      |
| 25 | caregiver?.ti,ab,id.                                                                                                                            |      |
| 26 | "care giver?".ti,ab,id.                                                                                                                         |      |
| 27 | (informal ADJ3 (care* OR support*)).ti,ab,id.                                                                                                   |      |
| 28 | ((family OR families OR spous* OR partner? OR parent* OR sibling? OR friend? OR relative? OR "loved one?") ADJ3 (carer* OR support*)).ti,ab,id. |      |
| 29 | "caregiver burden"/                                                                                                                             |      |
| 30 | (care* ADJ3 (burden OR needs)).ti,ab,id.                                                                                                        |      |
| 31 | OR/24-30 [informal caregivers]                                                                                                                  |      |
| 32 | "caregiver burden"/                                                                                                                             |      |
| 33 | burden*.ti,ab,id.                                                                                                                               |      |

|    |                                                                              |  |
|----|------------------------------------------------------------------------------|--|
| 34 | impact*.ti,ab,id.                                                            |  |
| 35 | needs.ti,ab,id.                                                              |  |
| 36 | experience*.ti,ab,id.                                                        |  |
| 37 | support.ti,ab,id.                                                            |  |
| 38 | OR/32-37 [burden]                                                            |  |
| 39 | 11 AND 23 AND 31 AND 38 [AYAs AND cancer AND informal caregivers AND burden] |  |

**Single line search:**

((early adolescence/ OR emerging adulthood/) OR (adolescent\* OR "young adult\*" OR teen OR teenage\* OR AYA OR AYAs OR TYA? OR "emerging adult\*").ti,ab,id.) AND (exp neoplasms/ OR (neoplas\* OR tumor? OR cancer? OR malignan\* OR metasta\* OR carcinoma? OR melanoma? OR sarcoma? OR leuk?emia? OR lymphoma?).ti,ab,id.) AND ((caregivers/ OR "caregiver burden"/) OR (caregiver? OR "care giver?").ti,ab,id. OR (informal ADJ3 (care\* OR support\*).ti,ab,id. OR ((family OR families OR spous\* OR partner? OR parent\* OR sibling? OR friend? OR relative? OR "loved one?") ADJ3 (carer\* OR support\*).ti,ab,id. OR (care\* ADJ3 (burden OR needs)).ti,ab,id.) AND ("caregiver burden"/ OR (burden\* OR impact\* OR needs OR experience\* OR support).ti,ab,id.)

2022-10-25:

Ovid MEDLINE(R) ALL <1946 to October 25, 2022>

| #  | Query                                                            | Hits    |
|----|------------------------------------------------------------------|---------|
| 1  | adolescent/                                                      | 2192073 |
| 2  | "young adult"/                                                   | 999125  |
| 3  | adolescent*.ti,ab,kf.                                            | 310162  |
| 4  | "young adult*".ti,ab,kf.                                         | 115609  |
| 5  | teen.ti,ab,kf.                                                   | 6309    |
| 6  | teenage*.ti,ab,kf.                                               | 24036   |
| 7  | AYA?.ti,ab,kf.                                                   | 2579    |
| 8  | TYA?.ti,ab,kf.                                                   | 611     |
| 9  | "emerging adult*".ti,ab,kf.                                      | 3823    |
| 10 | or/1-9 [AYA]                                                     | 2775648 |
| 11 | exp neoplasms/                                                   | 3752501 |
| 12 | neoplas*.ti,ab,kf.                                               | 439105  |
| 13 | tumor?.ti,ab,kf.                                                 | 1914166 |
| 14 | cancer?.ti,ab,kf.                                                | 2139039 |
| 15 | malignan*.ti,ab,kf.                                              | 660929  |
| 16 | metasta*.ti,ab,kf.                                               | 598895  |
| 17 | carcinoma?.ti,ab,kf.                                             | 743517  |
| 18 | melanoma?.ti,ab,kf.                                              | 133911  |
| 19 | sarcoma?.ti,ab,kf.                                               | 104502  |
| 20 | leuk?emia?.ti,ab,kf.                                             | 282012  |
| 21 | lymphoma?.ti,ab,kf.                                              | 198748  |
| 22 | or/11-21 [cancer]                                                | 4986584 |
| 23 | "caregiver burden"/                                              | 489     |
| 24 | "needs assessment"/                                              | 32269   |
| 25 | (burden* or impact or needs or experience* or support).ti,ab,kf. | 3883808 |
| 26 | or/23-25 [caregiver burden]                                      | 3898092 |
| 27 | 10 and 22 and 26                                                 | 70358   |
| 28 | (informal adj3 (care* or support*).ti,ab,kf.                     | 9664    |
| 29 | (non-medical adj3 (care* or support*).ti,ab,kf.                  | 335     |
| 30 | (family adj3 (care* or support*).ti,ab,kf.                       | 46482   |



|    |                                                                                                                                                               |        |
|----|---------------------------------------------------------------------------------------------------------------------------------------------------------------|--------|
| 31 | (families adj3 (care* or support*)).ti,ab,kf.                                                                                                                 | 12386  |
| 32 | (spous* adj3 (care* or support*)).ti,ab,kf.                                                                                                                   | 3180   |
| 33 | (partner? adj3 (care* or support*)).ti,ab,kf.                                                                                                                 | 6209   |
| 34 | (parent? adj3 (care* or support*)).ti,ab,kf.                                                                                                                  | 17188  |
| 35 | (sibling? adj3 (care* or support*)).ti,ab,kf.                                                                                                                 | 898    |
| 36 | (friend? adj3 (care* or support*)).ti,ab,kf.                                                                                                                  | 3500   |
| 37 | (relative* adj3 (care* or support*)).ti,ab,kf.                                                                                                                | 8565   |
| 38 | ("loved one?" adj3 (care* or support*)).ti,ab,kf.                                                                                                             | 589    |
| 39 | caregiver/ and (informal or non-medical or family or families or spous* or partner? or parent? or sibling? or friend? or relative* or "loved one?").ti,ab,kf. | 29352  |
| 40 | caregiver?.ti,ab,kf.                                                                                                                                          | 84446  |
| 41 | "caregiver burden"/                                                                                                                                           | 489    |
| 42 | (care* adj3 burden).ti,ab,kf.                                                                                                                                 | 13397  |
| 43 | or/28-42 [informal caregiver]                                                                                                                                 | 160860 |
| 44 | 27 and 43                                                                                                                                                     | 1922   |

| Ovid MEDLINE(R) ALL <1946 to October 13, 2022> |                                                         |         |
|------------------------------------------------|---------------------------------------------------------|---------|
| #                                              | Query                                                   | Hits    |
| 1                                              | adolescent/                                             | 2190326 |
| 2                                              | "young adult"/                                          | 998313  |
| 3                                              | adolescent*.ti,ab,kf.                                   | 309096  |
| 4                                              | "young adult*".ti,ab,kf.                                | 115217  |
| 5                                              | teen.ti,ab,kf.                                          | 6290    |
| 6                                              | teenage*.ti,ab,kf.                                      | 23982   |
| 7                                              | AYA?.ti,ab,kf.                                          | 2556    |
| 8                                              | TYA?.ti,ab,kf.                                          | 609     |
| 9                                              | "emerging adult*".ti,ab,kf.                             | 3798    |
| 10                                             | or/1-9 [AYA]                                            | 2773210 |
| 11                                             | exp neoplasms/                                          | 3745710 |
| 12                                             | neoplas*.ti,ab,kf.                                      | 438294  |
| 13                                             | tumo?r?.ti,ab,kf.                                       | 1909325 |
| 14                                             | cancer?.ti,ab,kf.                                       | 2132044 |
| 15                                             | malignan*.ti,ab,kf.                                     | 659216  |
| 16                                             | metasta*.ti,ab,kf.                                      | 597277  |
| 17                                             | carcinoma?.ti,ab,kf.                                    | 741912  |
| 18                                             | melanoma?.ti,ab,kf.                                     | 133601  |
| 19                                             | sarcoma?.ti,ab,kf.                                      | 104311  |
| 20                                             | leuk?emia?.ti,ab,kf.                                    | 281502  |
| 21                                             | lymphoma?.ti,ab,kf.                                     | 198329  |
| 22                                             | or/11-21 [cancer]                                       | 4975288 |
| 23                                             | 10 and 22 [AYA and cancer]                              | 394126  |
| 24                                             | (informal adj3 (care* or support*)).ti,ab,kf. and 23    | 86      |
| 25                                             | (non-medical adj3 (care* or support*)).ti,ab,kf. and 23 | 3       |
| 26                                             | (family adj3 (care* or support*)).ti,ab,kf. and 23      | 797     |
| 27                                             | (families adj3 (care* or support*)).ti,ab,kf. and 23    | 221     |
| 28                                             | (spous* adj3 (care* or support*)).ti,ab,kf. and 23      | 39      |
| 29                                             | (partner? adj3 (care* or support*)).ti,ab,kf. and 23    | 83      |
| 30                                             | (parent? adj3 (care* or support*)).ti,ab,kf. and 23     | 439     |

|    |                                                                                                                               |         |
|----|-------------------------------------------------------------------------------------------------------------------------------|---------|
| 31 | (sibling? adj3 (care* or support*)).ti,ab,kf. and 23                                                                          | 68      |
| 32 | (friend? adj3 (care* or support*)).ti,ab,kf. and 23                                                                           | 69      |
| 33 | (relative* adj3 (care* or support*)).ti,ab,kf. and 23                                                                         | 119     |
| 34 | ("loved one?" adj3 (care* or support*)).ti,ab,kf. and 23                                                                      | 6       |
| 35 | informal.ti,ab,kf. and caregiver/ and 23                                                                                      | 64      |
| 36 | non-medical.ti,ab,kf. and caregiver/ and 23                                                                                   | 4       |
| 37 | family.ti,ab,kf. and caregiver/ and 23                                                                                        | 421     |
| 38 | families.ti,ab,kf. and caregiver/ and 23                                                                                      | 176     |
| 39 | spous*.ti,ab,kf. and caregiver/ and 23                                                                                        | 44      |
| 40 | partner?.ti,ab,kf. and caregiver/ and 23                                                                                      | 45      |
| 41 | parent?.ti,ab,kf. and caregiver/ and 23                                                                                       | 206     |
| 42 | sibling?.ti,ab,kf. and caregiver/ and 23                                                                                      | 30      |
| 43 | friend?.ti,ab,kf. and caregiver/ and 23                                                                                       | 39      |
| 44 | relative*.ti,ab,kf. and caregiver/ and 23                                                                                     | 93      |
| 45 | "loved one?".ti,ab,kf. and caregiver/ and 23                                                                                  | 15      |
| 46 | (primary adj3 (carer? or caregiver? or caretaker?)).ti,ab,kf. and 23                                                          | 116     |
| 47 | "caregiver burden"/ and 23                                                                                                    | 8       |
| 48 | (care* adj3 burden).ti,ab,kf. and 23                                                                                          | 186     |
| 49 | or/24-48                                                                                                                      | 2067    |
| 50 | "caregiver burden"/ or "needs assessment"/ or (burden* or impact or needs or experience* or support).ti,ab,kf. [burden/needs] | 3883331 |
| 51 | 26 and 50                                                                                                                     | 643     |
| 52 | 27 and 50                                                                                                                     | 183     |
| 53 | 30 and 50                                                                                                                     | 334     |
| 54 | 37 and 50                                                                                                                     | 342     |
| 55 | 38 and 50                                                                                                                     | 141     |
| 56 | 41 and 50                                                                                                                     | 157     |

Embase.com (2022-10-19):

| #  | Query                                              | Results |
|----|----------------------------------------------------|---------|
| 1  | 'adolescent'/exp                                   | 1855603 |
| 2  | 'young adult'/exp                                  | 477239  |
| 3  | adolescent*:ti,ab,kw                               | 408942  |
| 4  | 'young adult*:ti,ab,kw                             | 153465  |
| 5  | teen:ti,ab,kw                                      | 8389    |
| 6  | teenage*:ti,ab,kw                                  | 34135   |
| 7  | aya\$:ti,ab,kw                                     | 4812    |
| 8  | tya\$:ti,ab,kw                                     | 369     |
| 9  | 'emerging adult*:ti,ab,kw                          | 4291    |
| 10 | #1 OR #2 OR #3 OR #4 OR #5 OR #6 OR #7 OR #8 OR #9 | 2325863 |
| 11 | 'neoplasm'/exp                                     | 5783684 |
| 12 | neoplas*:ti,ab,kw                                  | 530291  |
| 13 | tumo\$r\$:ti,ab,kw                                 | 2632338 |
| 14 | cancer\$:ti,ab,kw                                  | 3063696 |
| 15 | malignan*:ti,ab,kw                                 | 953915  |
| 16 | metasta*:ti,ab,kw                                  | 876983  |
| 17 | carcinoma\$:ti,ab,kw                               | 1014628 |
| 18 | melanoma\$:ti,ab,kw                                | 189764  |

|    |                                                                                                                                                                                                                                                                   |         |
|----|-------------------------------------------------------------------------------------------------------------------------------------------------------------------------------------------------------------------------------------------------------------------|---------|
| 19 | sarcoma\$:ti,ab,kw                                                                                                                                                                                                                                                | 130878  |
| 20 | leuk\$emia\$:ti,ab,kw                                                                                                                                                                                                                                             | 395494  |
| 21 | lymphoma\$:ti,ab,kw                                                                                                                                                                                                                                               | 294472  |
| 22 | #11 OR #12 OR #13 OR #14 OR #15 OR #16 OR #17 OR #18 OR #19 OR #20 OR #21                                                                                                                                                                                         | 6887368 |
| 23 | 'informal care'/de                                                                                                                                                                                                                                                | 59      |
| 24 | 'informal caregiver'/de                                                                                                                                                                                                                                           | 46      |
| 25 | 'informal caregiving'/de                                                                                                                                                                                                                                          | 17      |
| 26 | (informal NEAR/3 (care* OR support*)):ti,ab,kw                                                                                                                                                                                                                    | 11910   |
| 27 | ('non medical' NEAR/3 (care* OR support*)):ti,ab,kw                                                                                                                                                                                                               | 639     |
| 28 | (family NEAR/3 (care* OR support*)):ti,ab,kw                                                                                                                                                                                                                      | 60554   |
| 29 | (families NEAR/3 (care* OR support*)):ti,ab,kw                                                                                                                                                                                                                    | 16812   |
| 30 | (spous* NEAR/3 (care* OR support*)):ti,ab,kw                                                                                                                                                                                                                      | 4095    |
| 31 | (partner\$ NEAR/3 (care* OR support*)):ti,ab,kw                                                                                                                                                                                                                   | 8368    |
| 32 | (parent\$ NEAR/3 (care* OR support*)):ti,ab,kw                                                                                                                                                                                                                    | 22830   |
| 33 | (sibling\$ NEAR/3 (care* OR support*)):ti,ab,kw                                                                                                                                                                                                                   | 1203    |
| 34 | (friend\$ NEAR/3 (care* OR support*)):ti,ab,kw                                                                                                                                                                                                                    | 4448    |
| 35 | (relative* NEAR/3 (care* OR support*)):ti,ab,kw                                                                                                                                                                                                                   | 11016   |
| 36 | ('loved one\$' NEAR/3 (care* OR support*)):ti,ab,kw                                                                                                                                                                                                               | 955     |
| 37 | 'caregiver'/de AND (informal:ti,ab,kw OR 'non medical':ti,ab,kw OR family:ti,ab,kw OR families:ti,ab,kw OR spous*:ti,ab,kw OR partner\$:ti,ab,kw OR parent\$:ti,ab,kw OR sibling\$:ti,ab,kw OR friend\$:ti,ab,kw OR relative*:ti,ab,kw OR 'loved one\$':ti,ab,kw) | 53844   |
| 38 | (primary NEAR/3 (carer\$ OR caregiver\$ OR caretaker\$)):ti,ab,kw                                                                                                                                                                                                 | 8650    |
| 39 | 'caregiver burden'/de                                                                                                                                                                                                                                             | 9781    |
| 40 | (care* NEAR/3 burden):ti,ab,kw                                                                                                                                                                                                                                    | 19949   |
| 41 | #23 OR #24 OR #25 OR #26 OR #27 OR #28 OR #29 OR #30 OR #31 OR #32 OR #33 OR #34 OR #35 OR #36 OR #37 OR #38 OR #39 OR #40                                                                                                                                        | 165444  |
| 42 | #10 AND #22 AND #41                                                                                                                                                                                                                                               | 2404    |
| 43 | #42 NOT ('conference abstract'/it OR 'conference paper'/it OR 'conference review'/it)                                                                                                                                                                             | 1722    |
| 44 | #42 AND ('conference abstract'/it OR 'conference paper'/it OR 'conference review'/it)                                                                                                                                                                             | 682     |

#### CINAHL (19-10-2022)

| #  | Query                                                                                                                                                                                                                                                                                                                                                                                                                                                                                                                                               | Resultaten |
|----|-----------------------------------------------------------------------------------------------------------------------------------------------------------------------------------------------------------------------------------------------------------------------------------------------------------------------------------------------------------------------------------------------------------------------------------------------------------------------------------------------------------------------------------------------------|------------|
| S4 | S1 AND S2 AND S3                                                                                                                                                                                                                                                                                                                                                                                                                                                                                                                                    | 1,480      |
| S3 | (MH ("caregivers+" OR "Caregiver Burden+") OR TI ((informal OR non-medical OR family OR families OR spous* OR partner# OR parent# OR sibling# OR friend# OR relative* OR "loved one#") N3 (care* OR support*)) OR TI (primary N3 (carer# OR caregiver# OR caretaker#)) OR TI (care* N3 burden) OR AB ((informal OR non-medical OR family OR families OR spous* OR partner# OR parent# OR sibling# OR friend# OR relative* OR "loved one#") N3 (care* OR support*)) OR AB (primary N3 (carer# OR caregiver# OR caretaker#)) OR AB (care* N3 burden)) | 118,504    |
| S2 | (MH (neoplasms+) OR TI (neoplas* OR tumor# OR cancer# OR malignan* OR metasta* OR carcinoma# OR melanoma# OR sarcoma# OR leuk#emia# OR lymphoma#) OR AB (neoplas* OR tumor# OR cancer# OR malignan* OR metasta* OR carcinoma# OR melanoma# OR sarcoma# OR leuk#emia# OR lymphoma#))                                                                                                                                                                                                                                                                 | 871,017    |

|    |                                                                                                                                                                                                                                      |         |
|----|--------------------------------------------------------------------------------------------------------------------------------------------------------------------------------------------------------------------------------------|---------|
| S1 | (MH ("young adult" OR "Adolescence+") OR TI (adolescent* OR "young adult*" OR teen OR teenage* OR AYA# OR TYA# OR "emerging adult*") OR AB (adolescent* OR "young adult*" OR teen OR teenage* OR AYA# OR TYA# OR "emerging adult*")) | 763,372 |
|----|--------------------------------------------------------------------------------------------------------------------------------------------------------------------------------------------------------------------------------------|---------|

Numbers FLOW chart:

| Database                 | Numbers     |
|--------------------------|-------------|
| Medline via Ovid         | 2190        |
| Embase.com               | 1787        |
| CINAHL via Ebsco         | 1471        |
| PsycInfo via Ovid        | 319         |
| <b>Total</b>             | <b>5767</b> |
| Duplicates               | 2595        |
| <b>Unique references</b> | <b>3172</b> |

Conference abstracts:

| Database   | Numbers |
|------------|---------|
| Embase.com | 754     |
